# Supplementary material for: Solvent-induced synthesis of cobalt(ii) coordination polymers based on a rigid ligand and flexible carboxylic acid ligands: syntheses, structures and magnetic properties
Source: Royal Society of Chemistry journal article supplement (doi:10.1039/c5dt00578g), 2015-01-01
Supplement: c5dt00578g1.pdf [file c5dt00578g1.pdf]

# Solvent-Induced Synthesis of Cobalt(II) Coordination Polymers Based on a Rigid Ligand and Flexible Carboxylic Acid Ligands: Syntheses, Structures and Magnetic Properties

Ting Wang, Chuanlei Zhang, Zemin Ju and Hegen Zheng\*

*State Key Laboratory of Coordination Chemistry, School of Chemistry and Chemical Engineering, Collaborative Innovation Center of Advanced Microstructures, Nanjing University, Nanjing, 210093, China*

(P. R. China)

Fax: (+86)25-83314502, E-mail: zhenghg@nju.edu.cn

**Table S1. Selected Bond Distances and Angles for (1).**

|                                              |            |                                              |            |
|----------------------------------------------|------------|----------------------------------------------|------------|
| Co(1)-O(1)                                   | 2.089(2)   | Co(1)-O(2)                                   | 2.104(2)   |
| Co(1)-N(1) <sup>#2</sup>                     | 2.1480(17) | Co(1)-N(1) <sup>#1</sup>                     | 2.1480(17) |
| Co(1)-N(3) <sup>#3</sup>                     | 2.1492(18) | Co(1)-N(3)                                   | 2.1492(18) |
| O(1)-Co(1)-O(2)                              | 180.000(1) | O(1)-Co(1)-N(1) <sup>#2</sup>                | 91.33(5)   |
| O(2)-Co(1)-N(1) <sup>#2</sup>                | 88.67(5)   | O(1)-Co(1)-N(1) <sup>#1</sup>                | 91.33(5)   |
| O(2)-Co(1)-N(1) <sup>#1</sup>                | 88.67(5)   | N(1) <sup>#2</sup> -Co(1)-N(1) <sup>#1</sup> | 177.35(10) |
| O(1)-Co(1)-N(3) <sup>#3</sup>                | 88.59(4)   | O(2)-Co(1)-N(3) <sup>#3</sup>                | 91.41(4)   |
| N(1) <sup>#2</sup> -Co(1)-N(3) <sup>#3</sup> | 90.16(7)   | N(1) <sup>#1</sup> -Co(1)-N(3) <sup>#3</sup> | 89.90(7)   |
| O(1)-Co(1)-N(3)                              | 88.59(4)   | O(2)-Co(1)-N(3)                              | 91.41(4)   |
| N(1) <sup>#2</sup> -Co(1)-N(3)               | 89.90(7)   | N(1) <sup>#1</sup> -Co(1)-N(3)               | 90.16(7)   |
| N(3) <sup>#3</sup> -Co(1)-N(3)               | 177.19(9)  |                                              |            |

Symmetry codes: #1 = -x, -y, -z; #2 = x, -y, z + 1/2; #3 = -x, y, -z + 1/2.

**Table S2. Selected Bond Distances and Angles for (2).**

|                                |            |                                |            |
|--------------------------------|------------|--------------------------------|------------|
| Co(1)-O(5) <sup>#1</sup>       | 1.965(2)   | Co(1)-O(2)                     | 1.966(2)   |
| Co(1)-N(4)                     | 1.997(3)   | Co(1)-N(3)                     | 2.016(3)   |
| O(5) <sup>#1</sup> -Co(1)-O(2) | 100.75(10) | O(5) <sup>#1</sup> -Co(1)-N(4) | 112.10(11) |
| O(2)-Co(1)-N(4)                | 112.42(10) | O(5) <sup>#1</sup> -Co(1)-N(3) | 101.67(10) |
| O(2)-Co(1)-N(3)                | 111.77(10) | N(4)-Co(1)-N(3)                | 116.48(11) |

Symmetry codes: #1 =  $-x + 2, y - 1/2, -z + 3/2$ .

**Table S3. Selected Bond Distances and Angles for (3).**

|                                               |            |                                               |            |
|-----------------------------------------------|------------|-----------------------------------------------|------------|
| Co(1)-O(3) <sup>#1</sup>                      | 2.0196(14) | Co(1)-O(1)                                    | 2.0209(15) |
| Co(1)-N(1)                                    | 2.0567(16) | Co(1)-O(4) <sup>#2</sup>                      | 2.0615(14) |
| Co(1)-O(2) <sup>#3</sup>                      | 2.1169(14) |                                               |            |
| O(3) <sup>#1</sup> -Co(1)-O(1)                | 93.63(7)   | O(3) <sup>#1</sup> -Co(1)-N(1)                | 103.78(6)  |
| O(1)-Co(1)-N(1)                               | 106.09(7)  | O(3) <sup>#1</sup> -Co(1)-O(4) <sup>#2</sup>  | 161.01(6)  |
| O(1)-Co(1)-O(4) <sup>#2</sup>                 | 86.64(6)   | N(1)-Co(1)-O(4) <sup>#2</sup>                 | 94.34(6)   |
| O(3) <sup>#1</sup> -Co(1)-O(2) <sup>#3</sup>  | 87.38(6)   | O(1)-Co(1)-O(2) <sup>#3</sup>                 | 160.99(7)  |
| N(1)-Co(1)-O(2) <sup>#3</sup>                 | 92.05(6)   | O(4) <sup>#2</sup> -Co(1)-O(2) <sup>#3</sup>  | 86.33(6)   |
| O(3) <sup>#1</sup> -Co(1)-Co(1) <sup>#3</sup> | 82.19(5)   | O(1)-Co(1)-Co(1) <sup>#3</sup>                | 92.33(5)   |
| N(1)-Co(1)-Co(1) <sup>#3</sup>                | 160.04(5)  | O(4) <sup>#2</sup> -Co(1)-Co(1) <sup>#3</sup> | 78.83(4)   |
| O(2) <sup>#3</sup> -Co(1)-Co(1) <sup>#3</sup> | 68.98(5)   |                                               |            |

Symmetry codes: #1 =  $x, -y + 1, 1/2 + z$ ; #2 =  $1 - x, y - 1, -z + 3/2$ ; #3:  $-x + 1, -y, z + 2$ .

**Table S4. Selected Bond Distances and Angles for (4).**

|                                              |           |                                              |            |
|----------------------------------------------|-----------|----------------------------------------------|------------|
| Co(1)-O(2)                                   | 2.047(3)  | Co(1)-N(3) <sup>#1</sup>                     | 2.099(4)   |
| Co(1)-O(4) <sup>#2</sup>                     | 2.101(4)  | Co(1)-O(3) <sup>#3</sup>                     | 2.105(4)   |
| Co(1)-N(1)                                   | 2.118(5)  |                                              |            |
| O(2)-Co(1)-N(3) <sup>#1</sup>                | 88.85(16) | O(2)-Co(1)-O(4) <sup>#2</sup>                | 93.31(17)  |
| N(3) <sup>#1</sup> -Co(1)-O(4) <sup>#2</sup> | 88.29(17) | O(2)-Co(1)-O(3) <sup>#3</sup>                | 131.64(18) |
| N(3) <sup>#1</sup> -Co(1)-O(3) <sup>#3</sup> | 87.60(17) | O(4) <sup>#2</sup> -Co(1)-O(3) <sup>#3</sup> | 134.72(15) |
| O(2)-Co(1)-N(1)                              | 87.45(16) | N(3) <sup>#1</sup> -Co(1)-N(1)               | 175.73(16) |
| O(4) <sup>#2</sup> -Co(1)-N(1)               | 89.79(17) | O(3) <sup>#3</sup> -Co(1)-N(1)               | 96.45(18)  |

Symmetry codes: #1 =  $x - 1/2, -y + 1/2, z - 1/2$ , #2 =  $-x, y, -z + 1/2$ , #3 =  $x + 1/2, -y + 1/2, z - 1/2$

**Table S5. Selected Bond Distances and Angles for (5).**

|                                |            |                                |            |
|--------------------------------|------------|--------------------------------|------------|
| Co(1)-N(3)                     | 2.063(2)   | Co(1)-O(3)                     | 2.070(2)   |
| Co(1)-N(4) <sup>#3</sup>       | 2.076(2)   | Co(1)-O(5)                     | 2.147(2)   |
| Co(1)-O(6)                     | 2.219(2)   | Co(1)-O(2)                     | 2.237(2)   |
| N(3)-Co(1)-O(3)                | 98.12(9)   | N(3)-Co(1)-N(4) <sup>#3</sup>  | 94.48(10)  |
| O(3)-Co(1)-N(4) <sup>#3</sup>  | 95.77(9)   | N(3)-Co(1)-O(5)                | 91.97(9)   |
| O(3)-Co(1)-O(5)                | 163.66(10) | N(4) <sup>#3</sup> -Co(1)-O(5) | 96.23(10)  |
| N(3)-Co(1)-O(6)                | 150.85(9)  | O(3)-Co(1)-O(6)                | 109.29(9)  |
| N(4) <sup>#3</sup> -Co(1)-O(6) | 92.51(9)   | O(5)-Co(1)-O(6)                | 59.12(8)   |
| N(3)-Co(1)-O(2)                | 92.77(9)   | O(3)-Co(1)-O(2)                | 60.30(8)   |
| N(4) <sup>#3</sup> -Co(1)-O(2) | 155.78(9)  | O(5)-Co(1)-O(2)                | 106.60(10) |
| O(6)-Co(1)-O(2)                | 92.33(8)   |                                |            |

Symmetry codes: #1 =  $-x + 1, y, -z + 1/2$

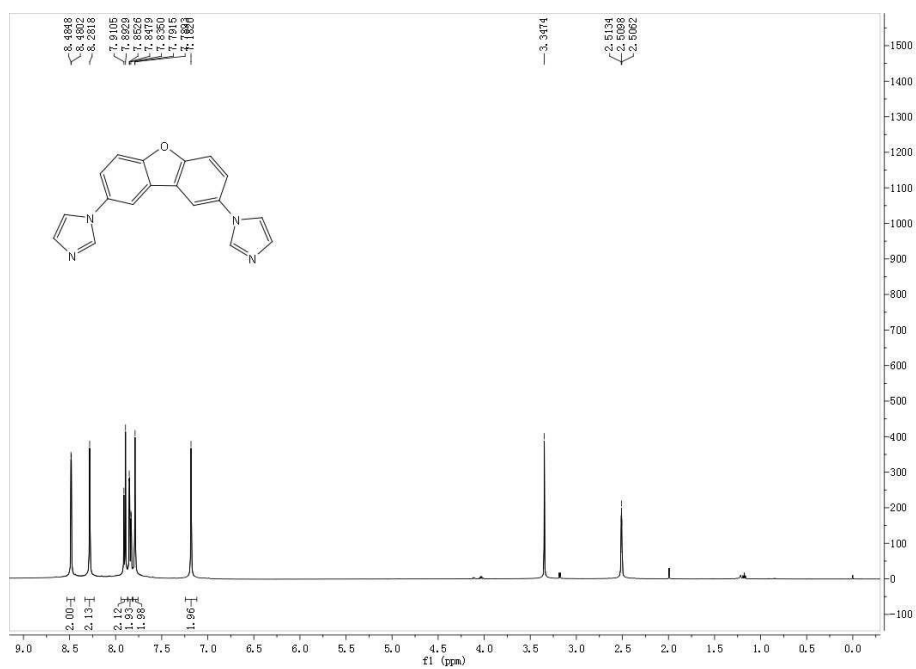

Figure S1. <sup>1</sup>H NMR spectra of L.

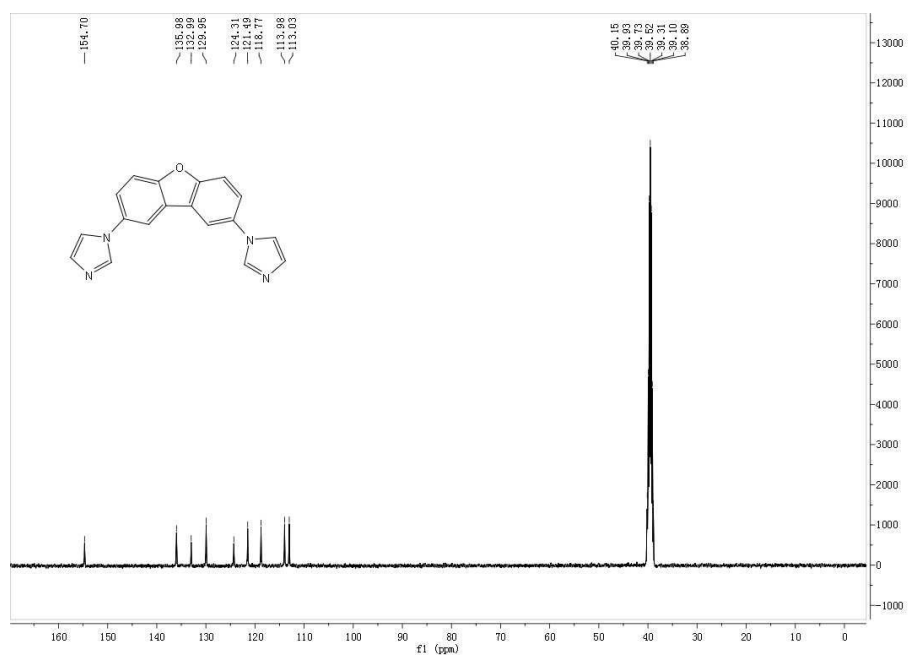

Figure S2. <sup>13</sup>C NMR spectra of L.

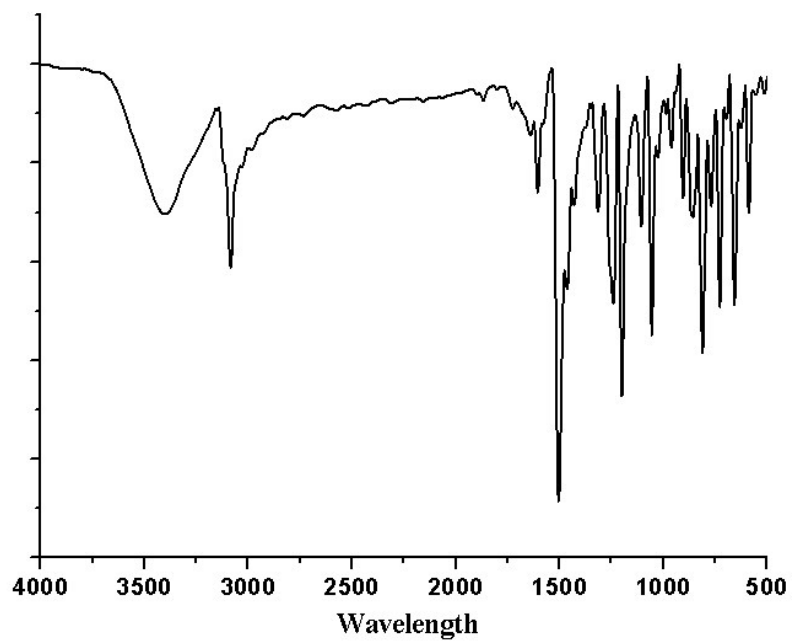

Figure S3. IR spectra of L.

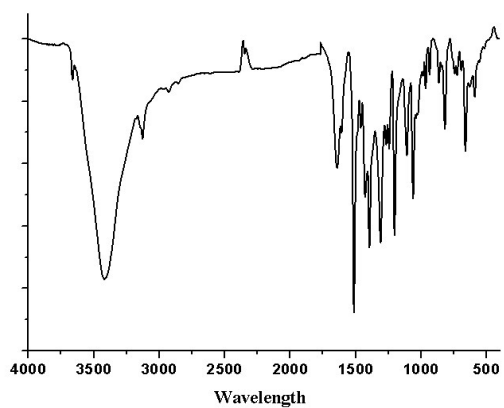

(1)

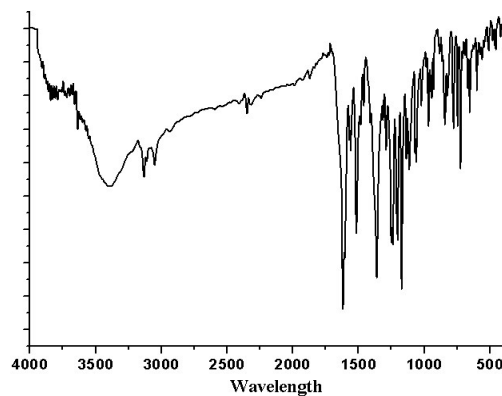

(2)

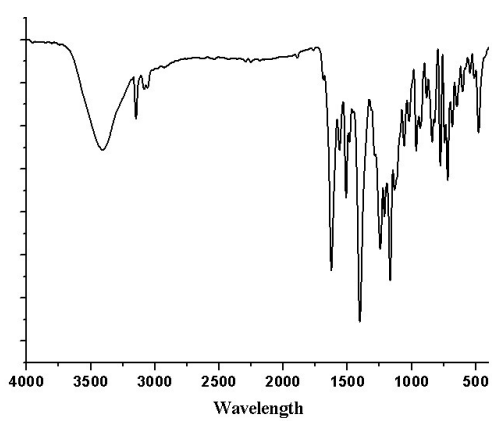

(3)

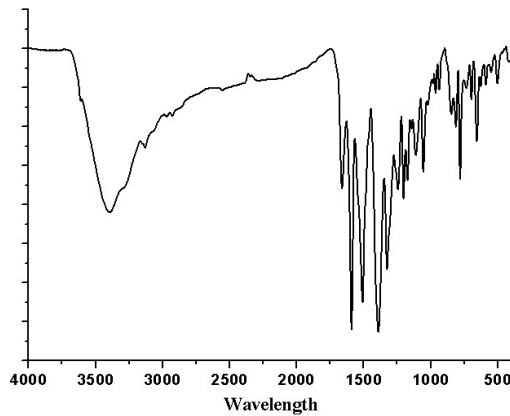

(4)

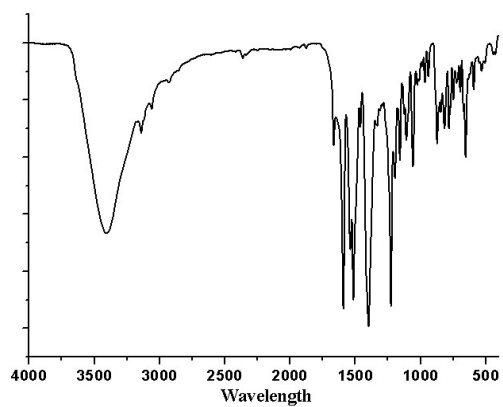

(5)

Figure S4. IR spectra of complex 1-5.

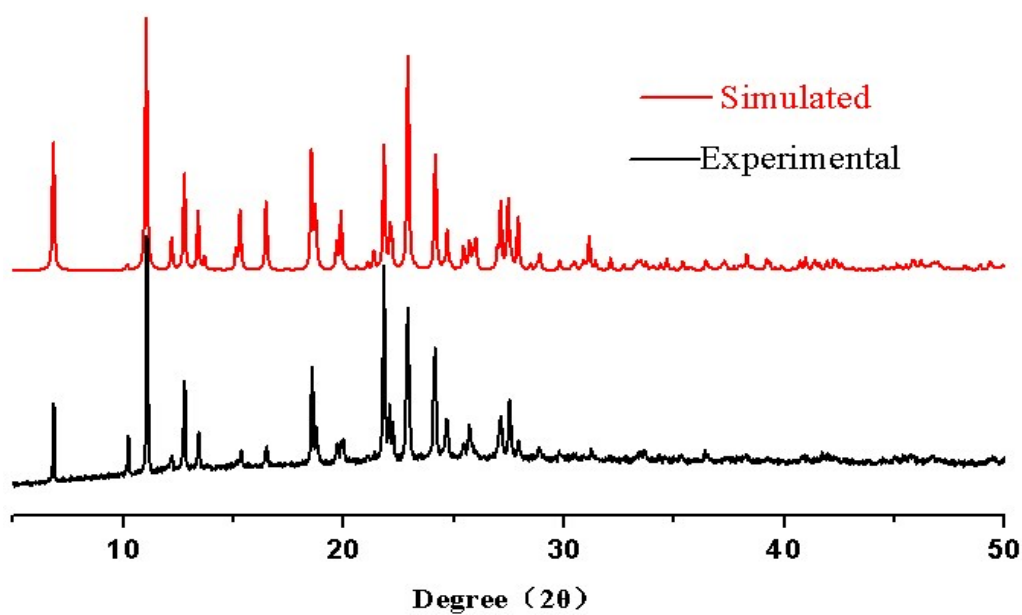

Figure S5. Powder X-ray diffraction patterns of complex 1

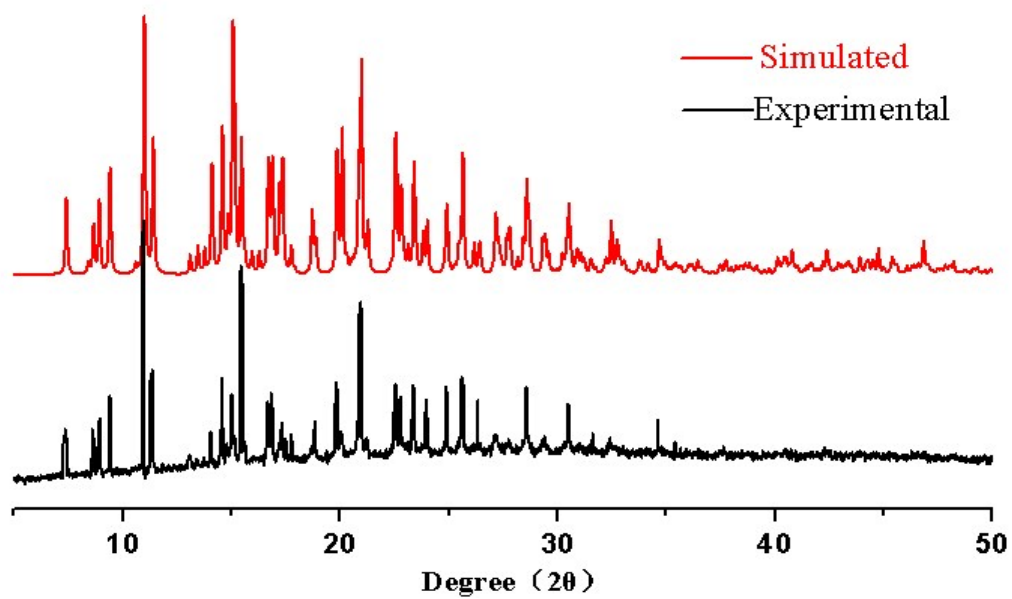

Figure S6. Powder X-ray diffraction patterns of complex 2

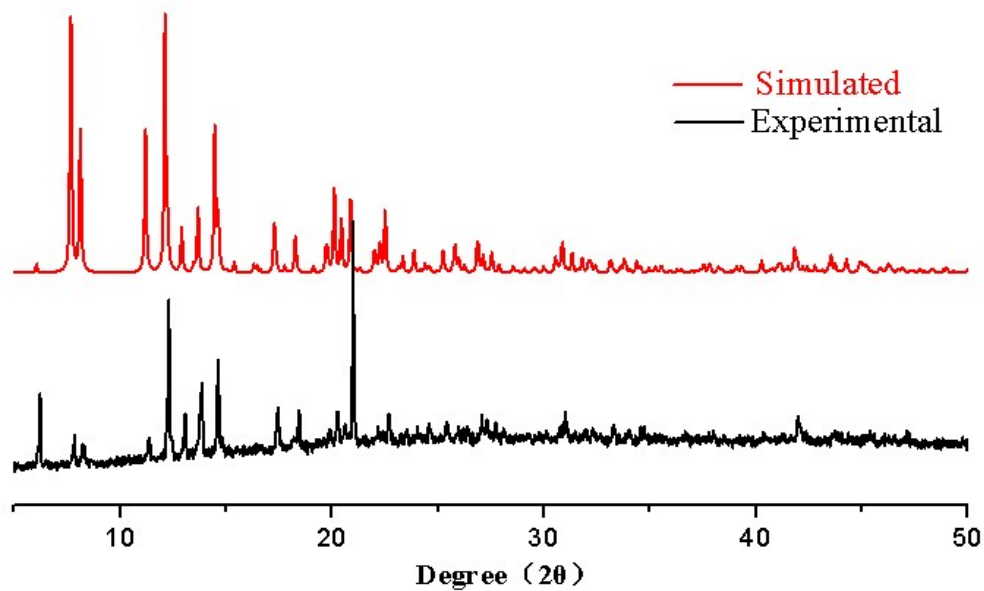

Figure S7. Powder X-ray diffraction patterns of complex 3

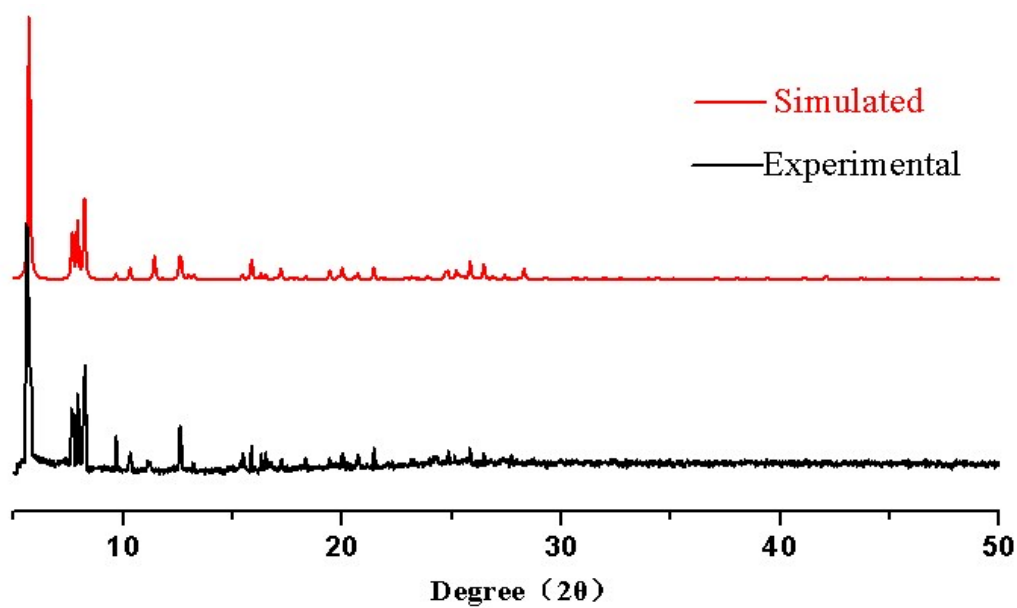

Figure S8. Powder X-ray diffraction patterns of complex 4

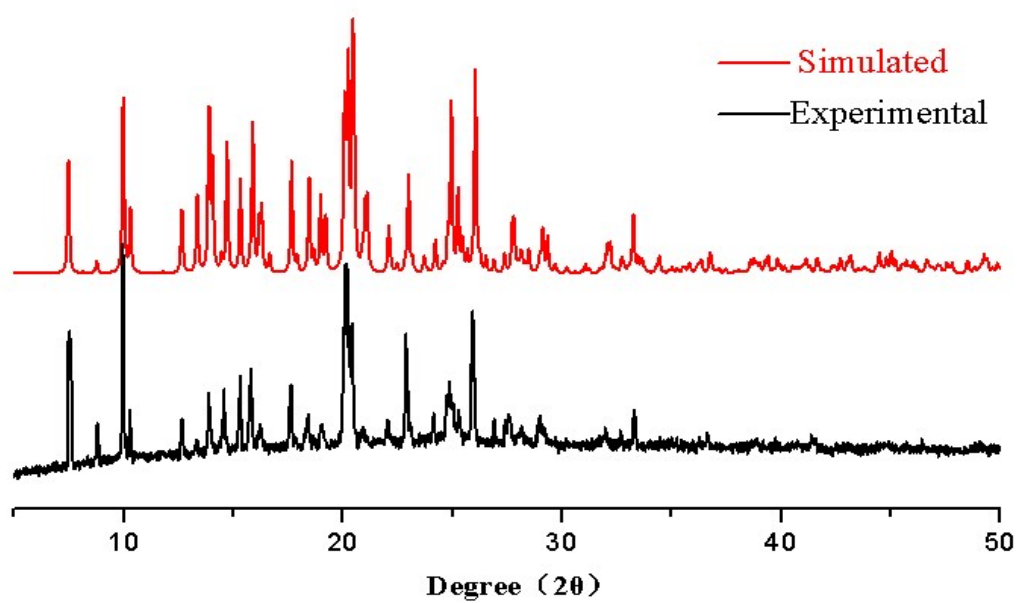

Figure S9. Powder X-ray diffraction patterns of complex 5
